# Supplementary material
Source: Research Square preprint supplement (doi:10.21203/rs.3.rs-9269738/v1)
Supplement: Supplementary file 1 [file 29f24f4d28762e2fdd3f24ec.docx]

***Supplementary Information***

**A Systematic Investigation into the Influence of Zeolite Framework Differences on the Catalytic Performance of Copper Sites in Ammonia Oxidation**

*Sisi Deng a, Fuming Liu a, Shuqing Denga, Ruifeng Miao a, Changqiu Chen a, Dingding Liu a*.*

*a. Department of Environmental Science & Engineering, College of Chemical Engineering, Huaqiao University, Xiamen, Fujian 361021, China.*

**Section 1**

**Table S1**. Physicochemical properties of proton and copper containing catalysts prepared in this study.

| Sample | IZA code | Pore topology | Pore size (A) | ICP elemental analysis  Si/Al Cu(wt%) | |
| --- | --- | --- | --- | --- | --- |
| H-BETA | BEA | 3D,12-ring | 6.5×6.7，5.6×5.6 | 20 |  |
| H-ZSM-5 | MFI | 3D,10-ring | 5.1×5.5，5.3×5.6 | 25 |  |
| H-SSZ-13 | CHA | 3D,8-ring | 3.8×3.8 | 20 |  |
| Cu/BETA |  |  |  | 20 | 1.90 |
| Cu-ZSM-5 |  |  |  | 25 | 1.74 |
| Cu-SSZ-13 |  |  |  | 20 | 1.94 |

**Section 2**

**Table S2**. The results of integrating the peak areas of Cu/SSZ-13, Cu/ZSM-5 and Cu/BETA catalysts by H2-TPR.

| Sample | Peak I | Peak II | Peak III |
| --- | --- | --- | --- |
| Cu/SSZ-13 | 0.044 | 0.037 | 0.047 |
| Cu/ZSM-5 | 0.036 | 0.047 | 0.030 |
| Cu/BETA | 0.030 | 0.035 | 0.023 |

**Section 3**


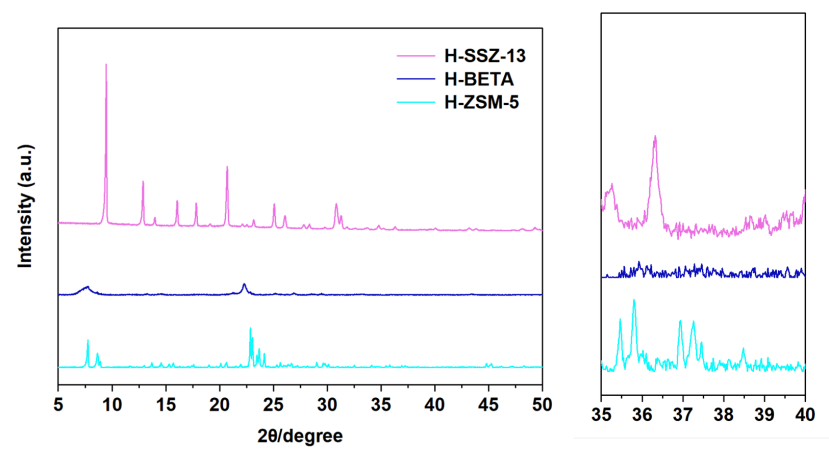


**Fig. S1**. XRD patterns of H-SSZ-13,H-BETA and H-ZSM-5.

**Section 4**


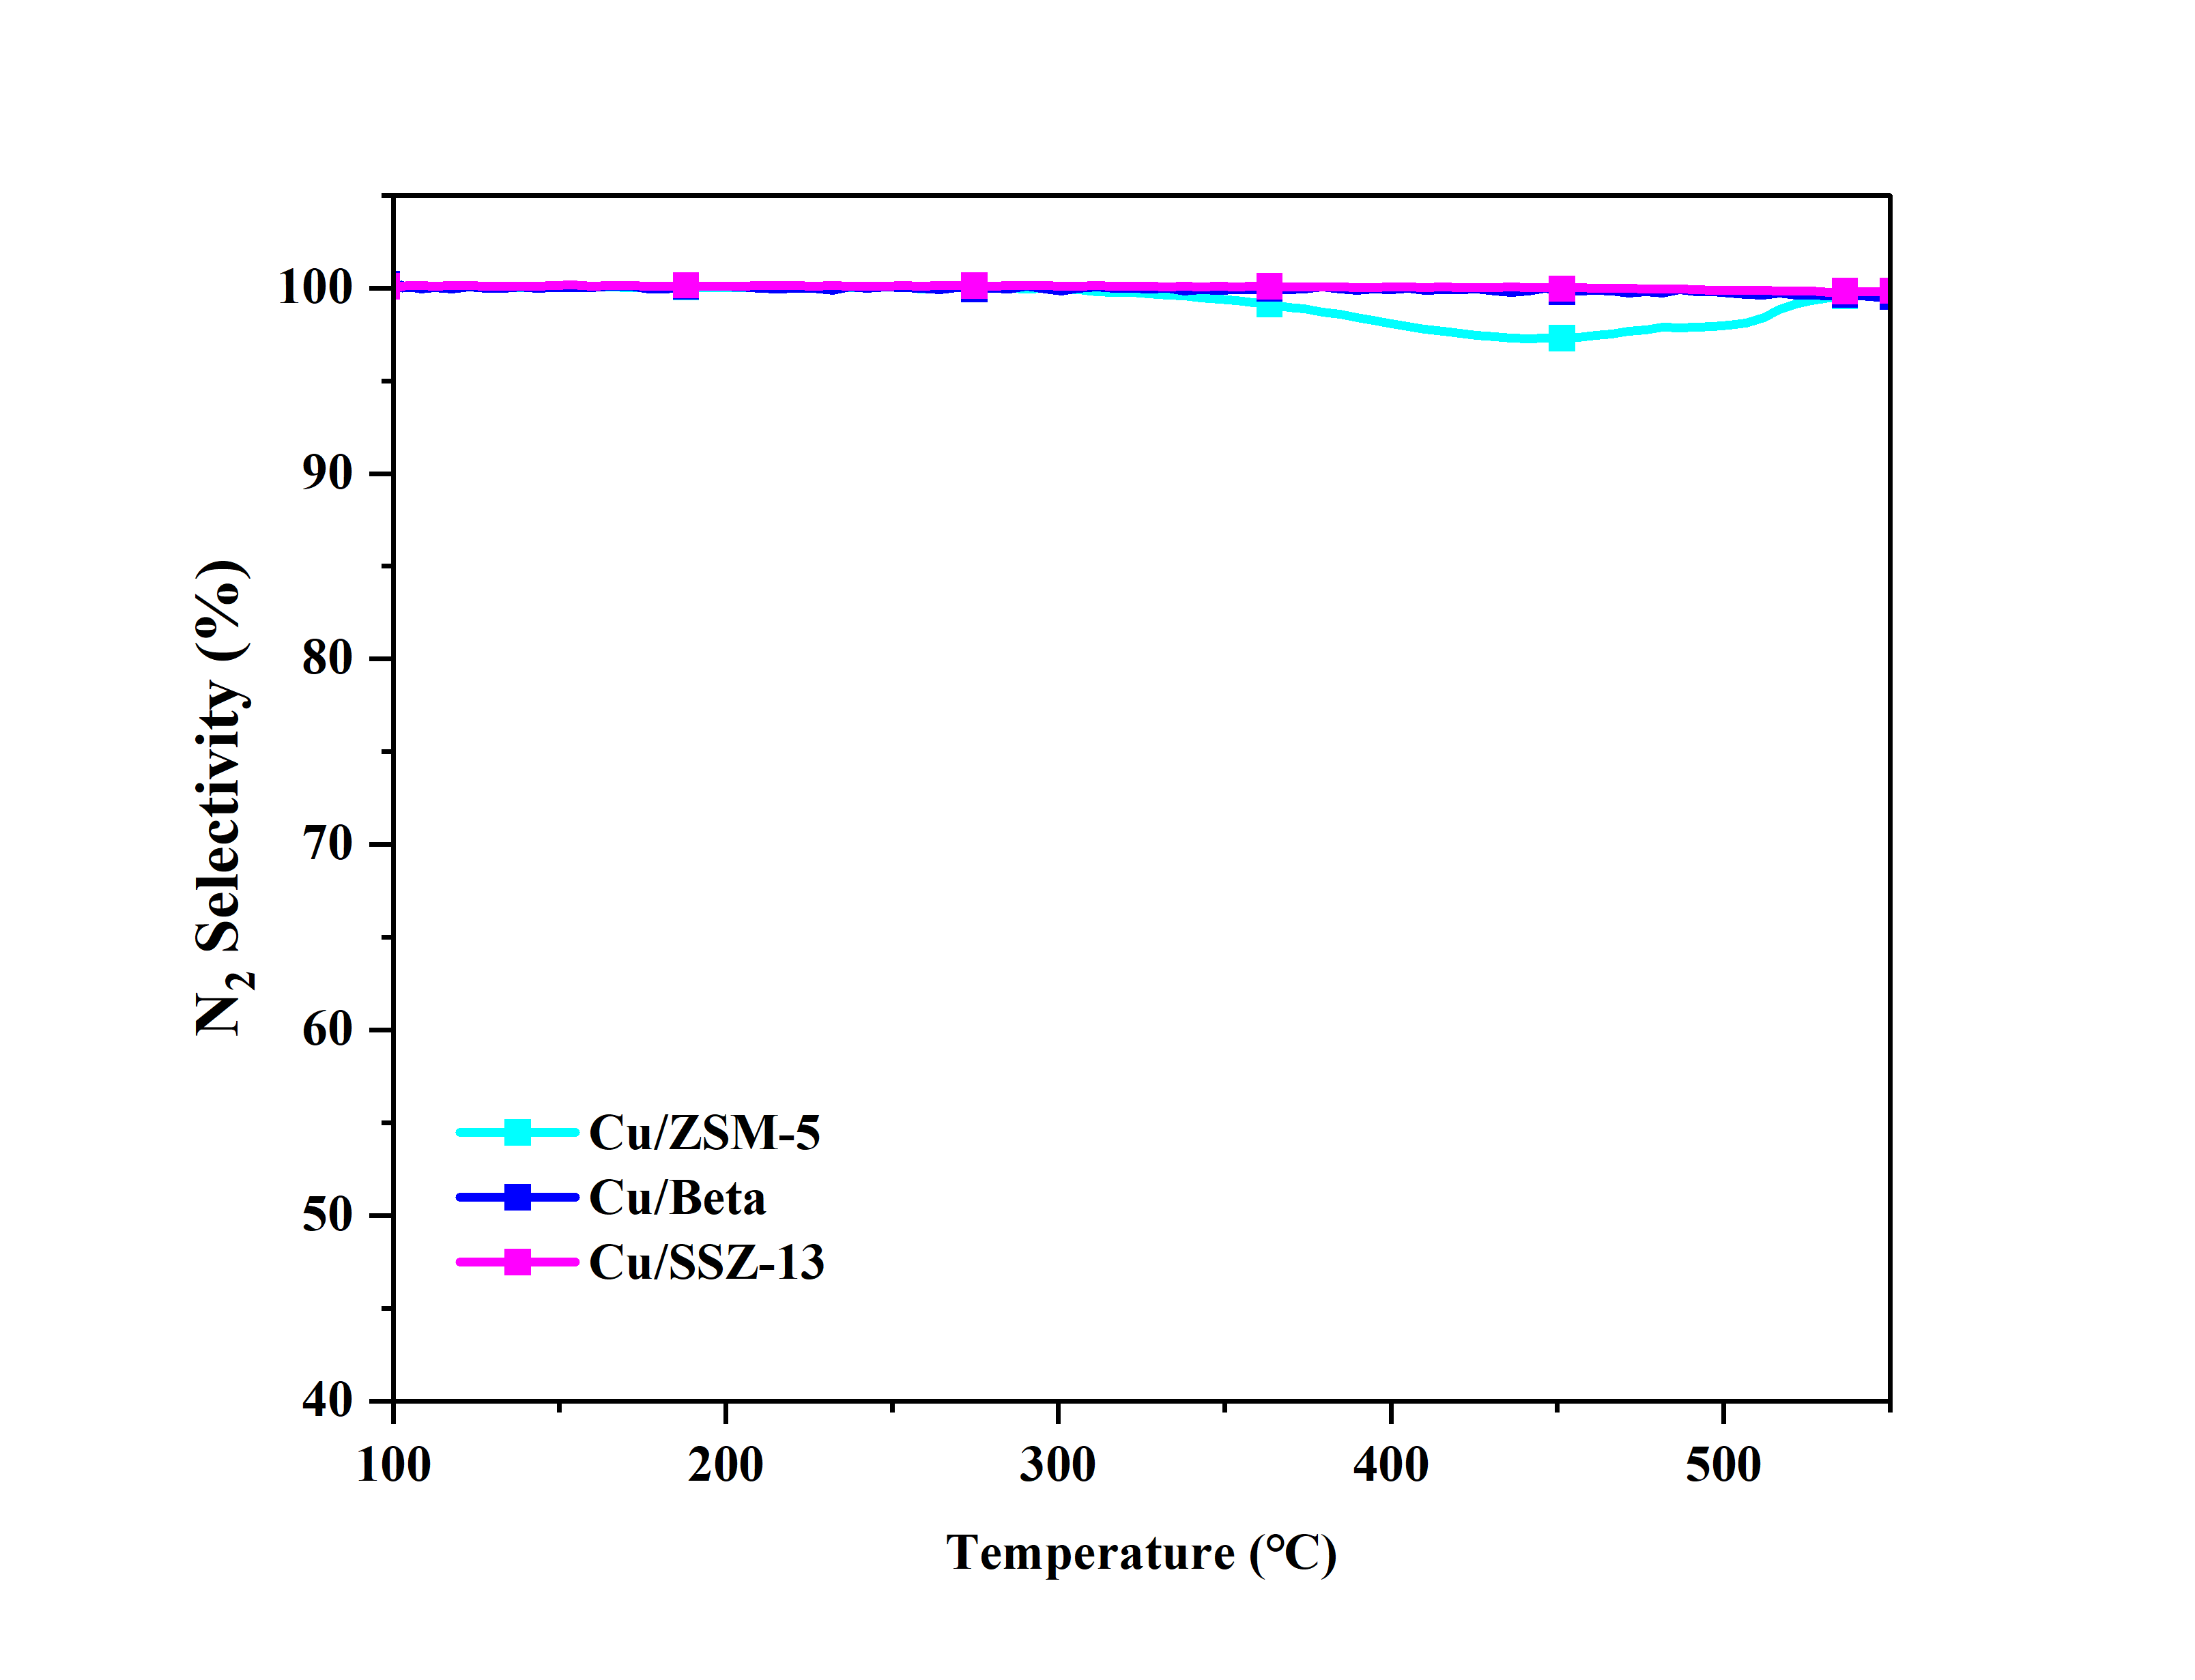


**Fig. S2**. The N2 selectivity of Cu-SSZ-13, Cu-ZSM-5, and Cu-BETA.

**Section 5**


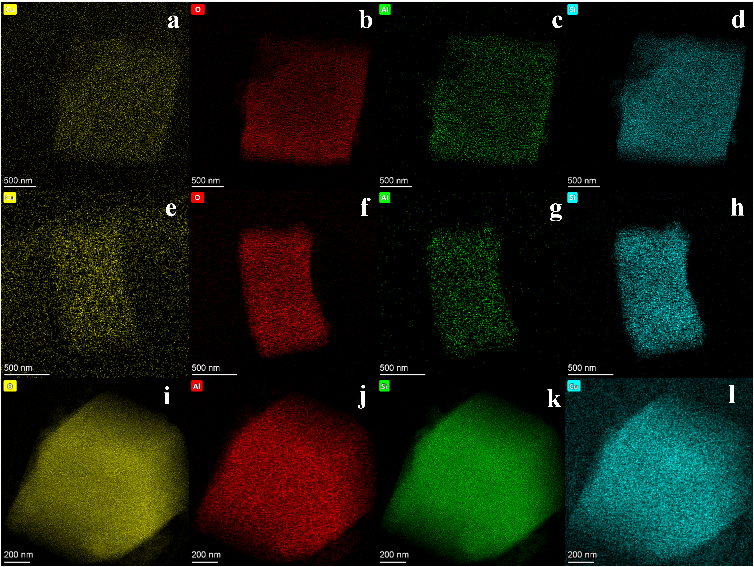


**Fig. S3**. EDS results of the Cu/SSZ-13 (a-d), Cu/ZSM-5 (e-h), and Cu/BETA (i-l) catalysts.

**Section 6**

**
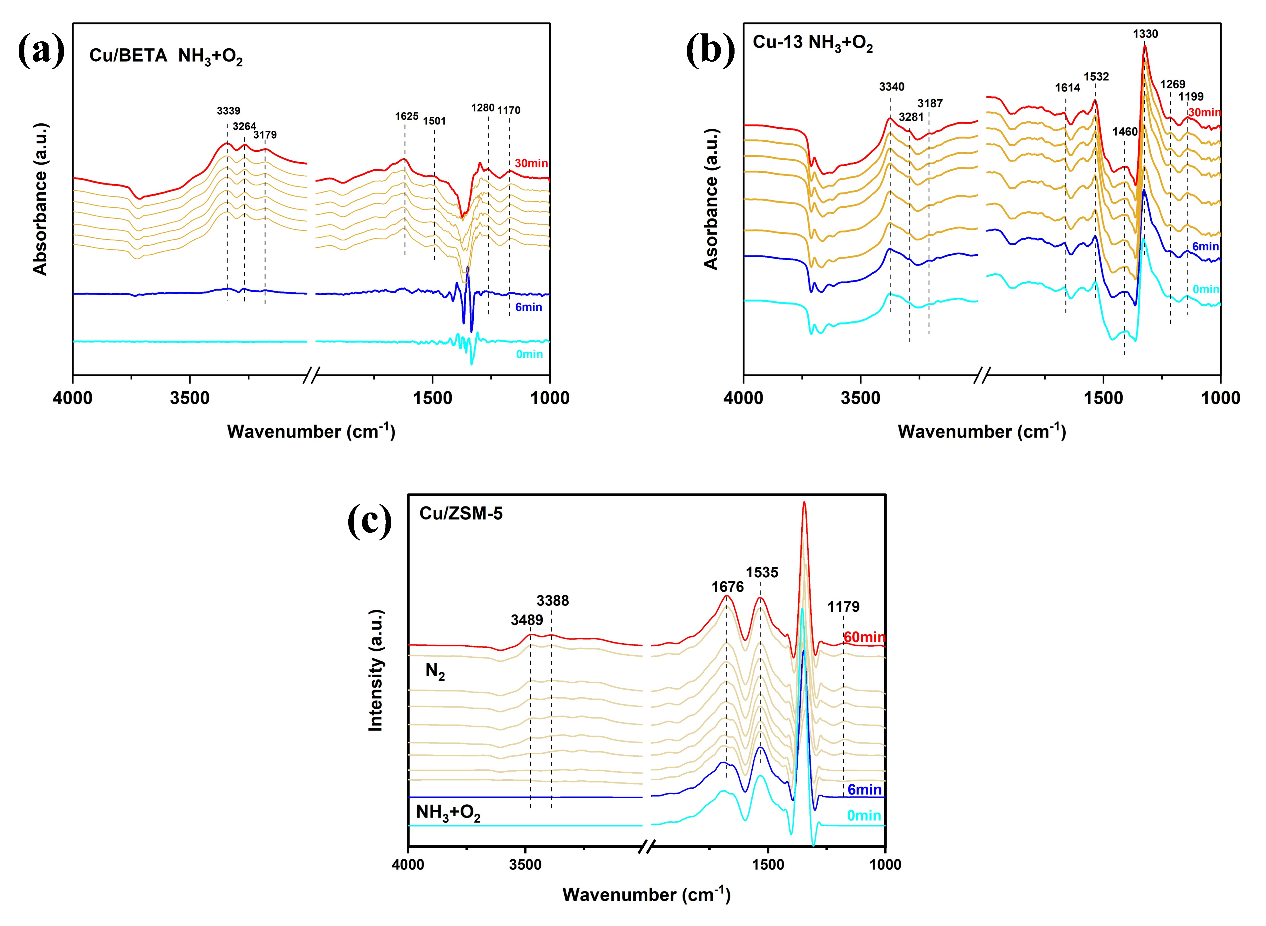
**

**Fig. S4**. In-situ infrared spectra of Cu/ZSM-5, Cu/BETA and Cu/SSZ-13 molecular sieves
